# Supplementary material
Source: Springer Nature journal article supplement (https://www.springermedizin.de/resource/supplementary/12879_2013_3689_MOESM1_ESM.pdf/9446450)
Supplement: MOESM1 [file 9446450]

**Additional file 1: Table S1. QuantiFERON<sup>®</sup>-TB Gold In-Tube (QFT-GIT) results in the 57 children in whom a QFT-GIT at inclusion and at 12 month follow-up was performed**

| QFT-GIT result                                                            | Number of children, n (%) |
|---------------------------------------------------------------------------|---------------------------|
| Follow-up results of children with QFT-GIT negative inclusion result      | 39                        |
| Remained negative                                                         | 33 (85)                   |
| Became positive                                                           | 4 (10)                    |
| Became indeterminate                                                      | 2 (5)                     |
| Follow-up results of children with QFT-GIT positive inclusion result      | 13                        |
| Remained positive                                                         | 5 (38)                    |
| Became negative                                                           | 5 (38)                    |
| Became indeterminate                                                      | 3 (24)                    |
| Follow-up results of children with QFT-GIT indeterminate inclusion result | 5                         |
| Remained indeterminate                                                    | 0 (0)                     |
| Became negative                                                           | 5 (100)                   |
| Became positive                                                           | 0 (0)                     |
